# Supplementary material for: Light-harvesting chlorophyll a/b-binding protein-coding genes in jatropha and the comparison with castor, cassava and arabidopsis
Source: PeerJ. 2020 Jan 28;8:e8465. doi: 10.7717/peerj.8465 (PMC6993755; doi:10.7717/peerj.8465)
Supplement: Table S3 [file peerj-08-8465-s006.xlsx]

## Sheet: Sheet1
Supplementary Table S3. Percent similarity between different JcLhc superfamily proteins.
	JcLhca1	JcLhca2	JcLhca3	JcLhca4	JcLhca5	JcLhca6	JcLhcb1.1	JcLhcb1.2	JcLhcb2	JcLhcb3	JcLhcb4	JcLhcb5	JcLhcb6	JcLhcb7	JcLhcb8	JcPsbS	JcELIP	JcOHP1	JcOHP2	JcSEP1	JcSEP2	JcSEP3	JcSEP4	JcSEP5	JcSEP6	JcPsb33	JcFCII
JcLhca1	100
JcLhca2	38.6	100
JcLhca3	37.6	48.8	100
JcLhca4	36.6	53.7	53.1	100
JcLhca5	37.8	48.4	48.2	48.3	100
JcLhca6	38.2	67.4	47.2	49.8	44.4	100
JcLhcb1.1	38.9	39.5	38.8	38.3	35.9	38	100
JcLhcb1.2	38.2	39.2	38.8	37.9	34.9	37.6	98.5	100
JcLhcb2	38.4	41.8	40.3	35.3	37	40.8	85	83.9	100
JcLhcb3	34.7	38.2	38.5	34.7	34.2	39	73.9	73.5	74.8	100
JcLhcb4	46.8	36.7	34.4	32.5	35.2	38	34.4	34	35.9	35.7	100
JcLhcb5	38.6	42.4	36.3	37.8	37.3	38.5	49.5	49.2	48.1	48.5	38.1	100
JcLhcb6	30.8	40.2	37.7	35.1	46.8	40.3	29.9	29.6	30.6	29.6	30.8	29.6	100
JcLhcb7	33	34.1	35.3	33	34.2	35	44.3	44	45.5	44.6	32.2	42.7	28	100
JcLhcb8	41.9	33.3	28.8	27.2	30.3	32.3	31.4	31.1	31	32.6	79.5	33.4	32.1	27.7	100
JcPsbS	21.8	26.3	27.9	26.3	26.3	27.3	26.8	26.1	26.1	29.1	23.4	25	20.1	22.9	20.7	100
JcELIP	20.5	22.9	19.5	20.1	23.8	19.7	21.1	21.4	21.1	21.7	19.7	22.2	19.3	19.5	19.8	20.5	100
JcOHP1	11.9	12.5	14.7	15.4	14.7	13.3	15.3	15.3	14.6	13.4	12.2	13.3	12	12.1	9.7	13.1	14	100
JcOHP2	15.8	19.3	15	17.5	18.8	19.1	13.7	13.7	14.4	15.1	13.3	17.3	15.7	12.9	12.1	12	20.2	16.5	100
JcSEP1	11.4	16.2	14.1	15	16.9	16.2	13.7	14.4	14.2	12.2	13.8	12.6	15	11.7	12.8	14.9	21.1	12.1	16.8	100
JcSEP2	17.9	14.6	18.8	15.7	18.3	16.8	19	19.7	17.2	17.1	17.1	18.1	18	14.4	15.3	18.1	21.7	14.2	13.3	12.8	100
JcSEP3	15.6	18.2	14.6	17	16.5	15.1	11.1	11.8	11.1	11.8	15.1	14.7	15	13	12.8	14.6	18.1	8.5	13.4	12.7	15.6	100
JcSEP4	17.3	16.7	15.4	16.9	15.9	17	16.5	16.2	18.8	15.8	15.4	18.6	14	12	13.4	14.7	16.7	14.7	18.5	19.7	17.5	12.5	100
JcSEP5	18.2	20.7	15.9	16.7	17.7	19.2	15.8	16.1	18.1	16.1	16.7	16.4	17.2	12.4	14.1	15.3	14.9	21	19.5	24.8	14.8	10.4	16.2	100
JcSEP6	15	19.6	15	15.4	17.4	16.1	13.9	14.3	14.7	15	16.2	18.3	15.4	13.1	14.4	18.8	16.2	8.3	10.9	13.5	13.4	55.5	11.7	15.1	100
JcPsb33	17	20.9	17.8	18	17.6	19.3	20.6	20.3	22.3	19	15.4	18.7	16.6	19.4	16.5	19.9	17.6	10.8	16.7	13.4	13.8	14.4	14.9	12.5	12.5	100
JcFCII	10	12.4	12.6	14	12.6	12	12.4	12	11.6	11	13	15	13.2	15	12	11.2	6.8	6.4	7.6	5.8	10.2	7.2	6.8	7.8	9.4	10.8	100
