# Supplementary material for: Light-harvesting chlorophyll a/b-binding protein-coding genes in jatropha and the comparison with castor, cassava and arabidopsis
Source: PeerJ. 2020 Jan 28;8:e8465. doi: 10.7717/peerj.8465 (PMC6993755; doi:10.7717/peerj.8465)
Supplement: Table S4 [file peerj-08-8465-s007.xlsx]

## Sheet: Sheet1
Supplementary Table S4. GO annotation of the Lhc superfamily.
GO accession	Description	Term type
GO:0009507	chloroplast	cellular component
GO:0009535	chloroplast thylakoid membrane	cellular component
GO:0009536	plastid	cellular component
GO:0009579	thylakoid	cellular component
GO:0009941	chloroplast envelope	cellular component
GO:0010287	plastoglobule	cellular component
GO:0016020	membrane	cellular component
GO:0042651	thylakoid membrane	cellular component
GO:0009533	chloroplast stromal thylakoid	cellular component
GO:0030076	light-harvesting complex	cellular component
GO:0009782	photosystem I antenna complex	cellular component
GO:0009783	photosystem II antenna complex	cellular component
GO:0009517	PSII associated light-harvesting complex II	cellular component
GO:0003674	molecular_function	molecular function
GO:0016168	chlorophyll binding	molecular function
GO:0031409	pigment binding	molecular function
GO:0005198	structural molecule activity	molecular function
GO:0051738	xanthophyll binding	molecular function
GO:0051537	2 iron, 2 sulfur cluster binding	molecular function
GO:0016491	oxidoreductase activity	molecular function
GO:0004325	ferrochelatase activity	molecular function
GO:0005488	binding	molecular function
GO:0005515	protein binding	molecular function
GO:0008289	lipid binding	molecular function
GO:0003824	catalytic activity	molecular function
GO:0008150	biological_process	biological process
GO:0009987	cellular process	biological process
GO:0006783	heme biosynthetic process	biological process
GO:0009058	biosynthetic process	biological process
GO:0008152	metabolic process	biological process
GO:0010380	regulation of chlorophyll biosynthetic process	biological process
GO:0055114	oxidation-reduction process	biological process
GO:0015979	photosynthesis	biological process
GO:0009765	photosynthesis, light harvesting	biological process
GO:0009768	photosynthesis, light harvesting in photosystem I	biological process
GO:0009769	photosynthesis, light harvesting in photosystem II	biological process
GO:0010196	nonphotochemical quenching	biological process
GO:0009637	response to blue light	biological process
GO:0010114	response to red light	biological process
GO:0010218	response to far red light	biological process
GO:0080167	response to karrikin	biological process
GO:0009651	response to salt stress	biological process
GO:0009409	response to cold	biological process
GO:0010224	response to UV-B	biological process
GO:0009644	response to high light intensity	biological process
GO:0009642	response to light intensity	biological process
GO:0009628	response to abiotic stimulus	biological process
GO:0006950	response to stress	biological process
